# Supplementary material
Source: PubMed Central journal article supplement (PMC3811341)
Supplement: EC.00129-13_zek999094159so1.pdf [file EC.00129-13_zek999094159so1.pdf]

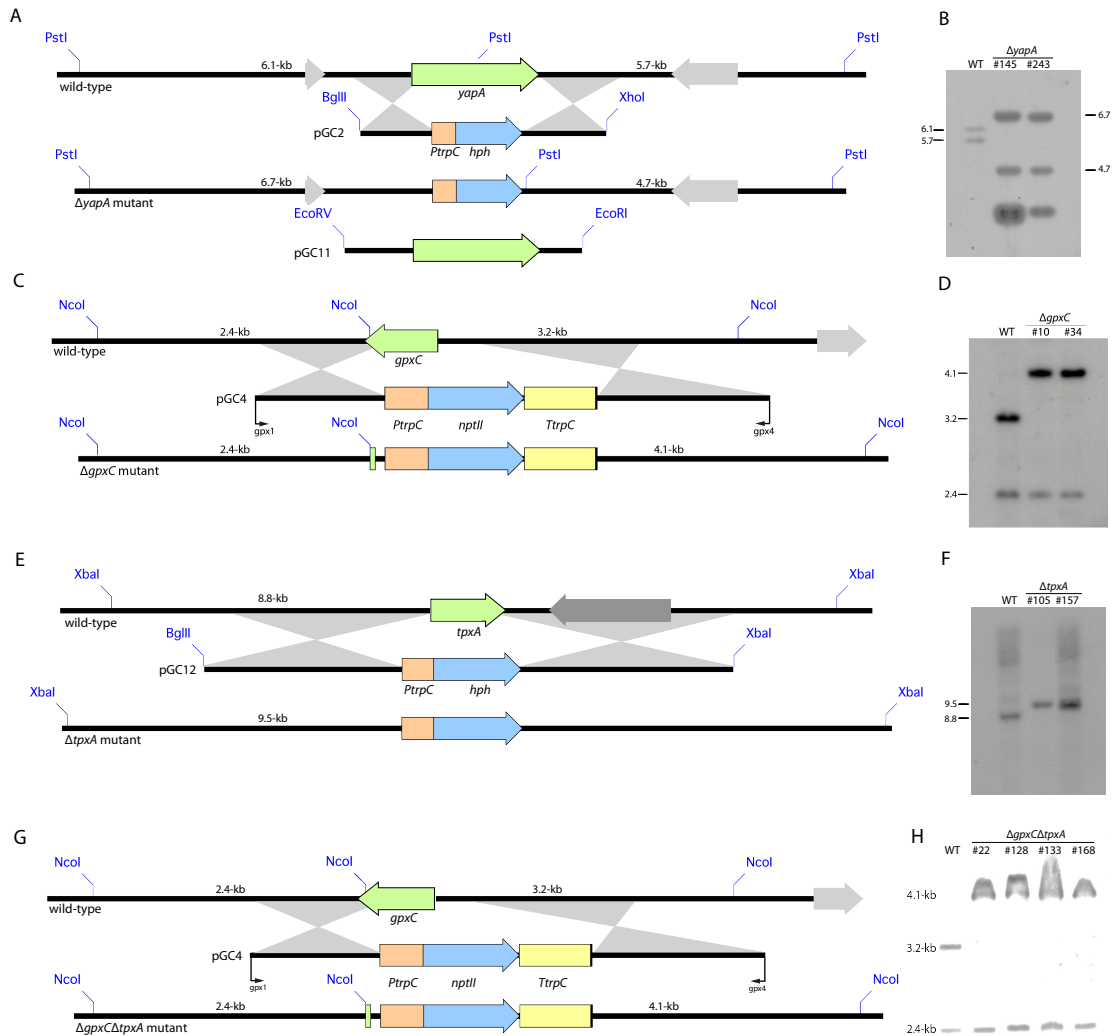

**SUPPL. FIG. 1.** Confirmation of *E. festucae yapA*, *gpxC* and *tpxA* single and *gpxC* and *tpxA* double deletions by Southern blotting (A) Schematic of the wild-type *yapA* locus, linearised replacement construct (pGC2),  $\Delta yapA$  mutant genomic locus and complementation construct (pGC11). The regions of recombination between homologous sequences flanking the *yapA* locus and *hph* resistance cassette are indicated by grey shading. Restriction enzyme sites used to generate linear replacement (*Bgl*II, *Xho*I) and complementation fragments (*EcoRV*, *EcoRI*) and for Southern analysis (*Pst*I) are indicated. Grey arrows indicate genes flanking *yapA*. (B) Autoradiograph of Southern blot of *Pst*I digests (1  $\mu$ g) of *E. festucae* WT/PN2278 (lane 1),  $\Delta yapA$ #145/ PN2740 (lane 2) and  $\Delta yapA$ #243/ PN2739 (lane 3) genomic DNA, probed with  $^{32}$ P-labelled pGC2. The expected fragment sizes are 6.1- and 5.7-kb for wild-type and 6.7- and 4.7-kb for the  $\Delta yapA$  mutants. The additional 3.8-kb band corresponds to the size of the construct indicating it has integrated as a tandem repeat at the *yapA* locus. (C) Schematic of the wild-type *gpxC* locus, linearised replacement construct (pGC4) and  $\Delta gpxC$  mutant genomic locus. The regions of recombination between homologous sequences flanking the *gpxC* locus and *nptII* resistance cassette are indicated by grey shading. Primer pair *gpx1/gpx4* used to generate linear replacement fragment and restriction enzyme sites used for Southern analysis (*Nco*I) are indicated. Grey arrow indicates gene flanking *gpxC*. (D) Autoradiograph of Southern blot of *Nco*I digests (1  $\mu$ g) of *E. festucae* F11/ PN2278 (lane 1),  $\Delta gpxC$ #10/ PN2741 (lane 2) and  $\Delta gpxC$ #34/ PN2742 (lane 3) genomic DNA, probed with  $^{32}$ P-labelled pGC4. The expected fragment sizes are 3.2- and 2.4-kb for wild-type and 4.1- and 2.4-kb for the  $\Delta gpxC$  mutants. (E) Schematic of the wild-type *tpxA* locus, linearised replacement construct (pGC12) and  $\Delta tpxA$  mutant genomic locus. The regions of recombination between homologous sequences flanking the *tpxA* locus and *hph* resistance cassette are indicated by grey shading. Restriction enzyme sites used to generate the linear replacement fragment (*Bgl*II, *Xba*I) and for Southern analysis (*Xba*I) are indicated. Grey arrow indicates gene flanking *tpxA*. (F) Autoradiograph of Southern blot of *Xba*I digests (1  $\mu$ g) of *E. festucae* F11/ PN2278 (lane 1),  $\Delta tpxA$ #105/ PN2821 (lane 2) and  $\Delta tpxA$ #157/ PN2822 (lane 3) genomic DNA, probed with  $^{32}$ P-labelled pGC12. The expected

fragment sizes are 8.8-kb for wild-type and 9.5-kb for the  $\Delta prxA$  mutants. (G) Schematic of the wild-type *gpxC* locus, linearised replacement construct (pGC4) and  $\Delta gpxC$  mutant genomic region for generation of the double mutant in a  $\Delta prxA$  background. The regions of recombination between homologous sequences flanking the *gpxC* locus and *nrp1* resistance cassette are indicated by grey shading. The *gpxC* was deleted in the  $\Delta prxA\#105$  background. Primer pair *gpx1/gpx4* used to generate linear replacement fragment and restriction enzyme sites used for Southern analysis (*NcoI*) are indicated. Grey arrow indicates gene flanking *gpxC*. (H) Autoradiograph of Southern blot of *NcoI* digests (1  $\mu$ g) of *E. festucae* F11/ PN2278 (lane 1),  $\Delta gpxC\Delta prxA\#22$ /PN2831 (lane 2),  $\Delta gpxC\Delta prxA\#128$ /PN2828 (lane 3),  $\Delta gpxC\Delta prxA\#133$ /PN2829 (lane 4) and  $\Delta gpxC\Delta prxA\#168$ /PN2830 (lane 5) genomic DNA, probed with DIG-labeled *gpx1/gpx4* PCR fragment from pGC4. The expected fragment sizes are 3.2- and 2.4-kb for wild-type and 4.1- and 2.4-kb for the  $\Delta gpxC\Delta prxA$  mutants.

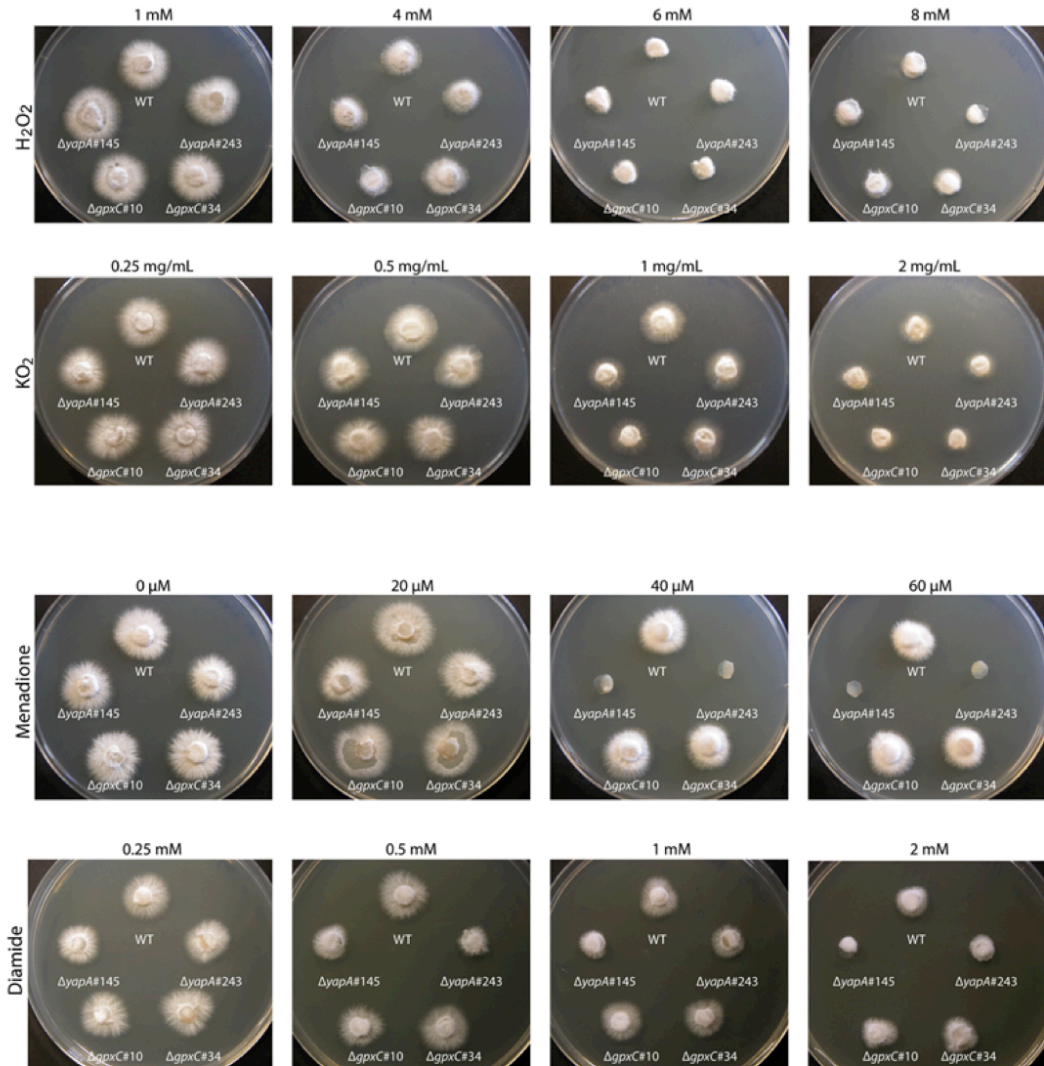

**SUPPL. FIG. 2.** Oxidative stress sensitivity of *E. festucae* deletion strains. Agar plugs 5 mm in diameter of strains indicated were inoculated onto PD medium containing a range of H<sub>2</sub>O<sub>2</sub>, KO<sub>2</sub>, menadione and diamide concentrations as shown and cultured at 22°C for 7 days.

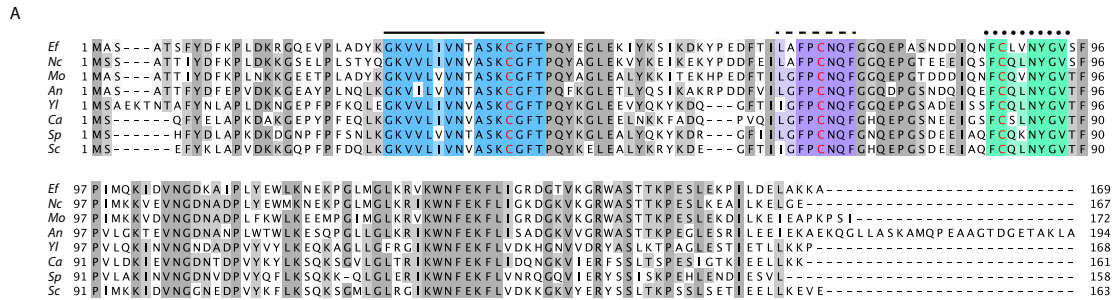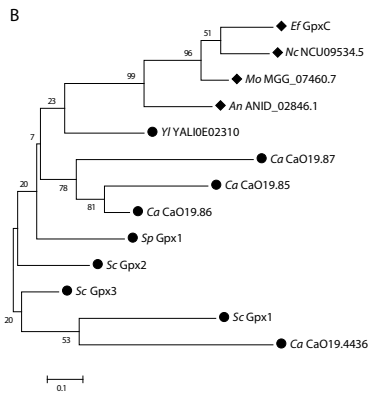

**SUPPL. FIG. 3.** Multiple sequence alignment and maximum-likelihood dendrogram of fungal GPx proteins. (A) Multiple sequence alignment of fungal GPx proteins. Solid line indicates active-site motif, dashed line indicates GPx family signature motif and dotted line indicates region containing the resolving cysteine. Conserved cysteine residues are highlighted in red. In species where multiple Gpx3-like proteins were present (*C. albicans*) the protein sharing the highest identity and similarity (CaO19.86, XP\_714295.1) to *S. cerevisiae* Gpx3 was aligned. *Ef*, *Epichloë festucae*; *Nc*, *Neurospora crassa*; *Mo*, *Magnaporthe oryzae*; *An*, *Aspergillus nidulans*; *Yl*, *Yarrowia lipolytica*; *Ca*, *Candida albicans*; *Sp*, *Schizosaccharomyces pombe*; *Sc*, *Saccharomyces cerevisiae*.

(B) Maximum-likelihood dendrogram of fungal GPx proteins. Values above branches indicate bootstrap values based on 2000 replicates. Gene IDs with associated GenBank accession numbers in parentheses are as follows: *Ef*, *E. festucae* GpxC EfM2.018640 (KC121578); *Nc*, *N. crassa* NCU09534.5 (XP\_957919.1); *Mo*, *M. oryzae* MGG\_07460.7 (XP\_367549.2); *An*, *A. nidulans* ANID\_02846.1 (XP\_660450.1); *Yl*, *Y. lipolytica* YALIOE02310 (XP\_503454.1); *Ca*, *C. albicans* CaO19.87 (XP\_714296.1), CaO19.85 (XP\_714294.1), CaO19.86 (XP\_714295.1); *Sp*, *S. pombe* Gpx1 SPBC32F12.03c (NP\_596146.1); *Sc*, *S. cerevisiae* Gpx2 YBR244W (NP\_009803.1), Gpx3 YIR037W (NP\_012303.1), Gpx1 YKL026C (NP\_012899.1), *Ca*, *C. albicans* CaO19.4436 (XP\_714081.1). ◆ = filamentous fungal species, ● = yeast species.

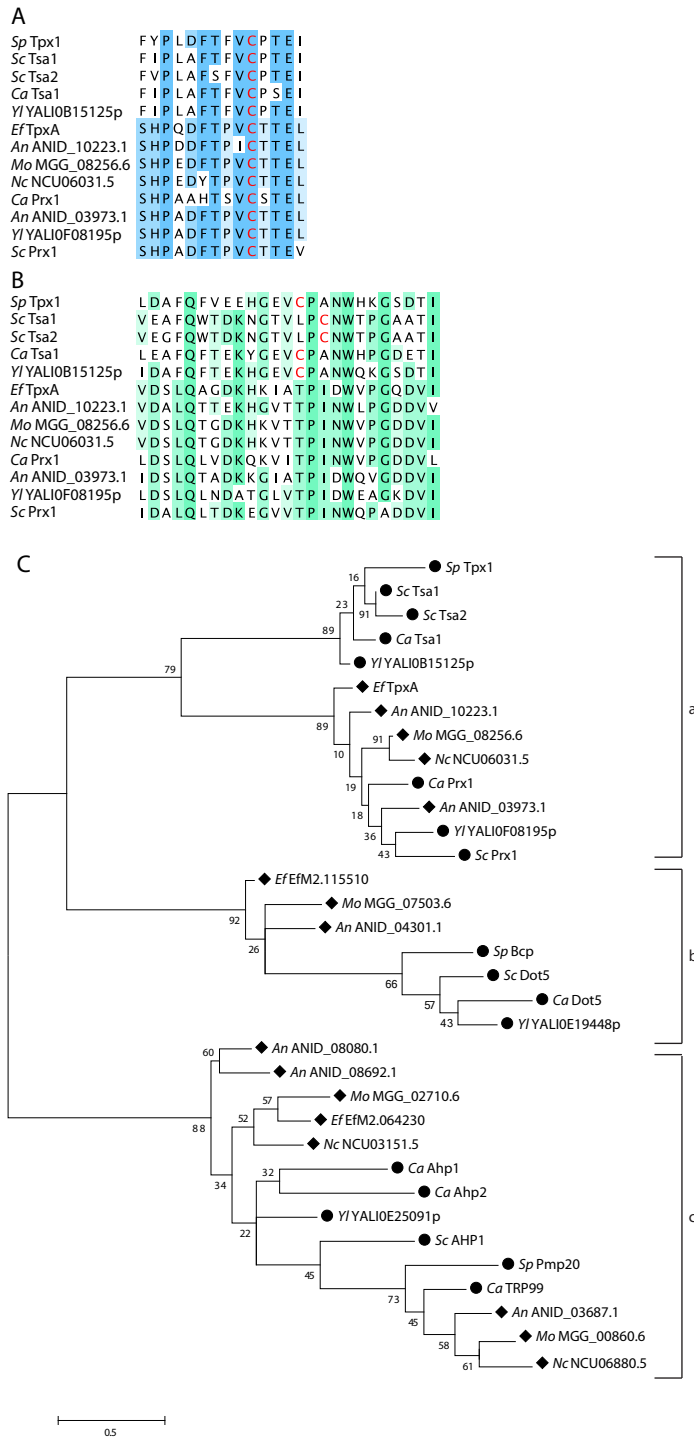

**SUPPL. FIG. 4.** Multiple sequence alignment and maximum-likelihood dendrogram of Prx signature motifs. (A) Multiple sequence alignment of Prx signature motifs. The first Prx signature motif from peroxiredoxin proteins from clade a in C. Conserved peroxidatic cysteine residues are highlighted in red. (B) The second Prx signature motif from peroxiredoxin proteins from clade a in (C). Conserved resolving cysteine residues, where present, are highlighted in red. *Sp*, *Schizosaccharomyces pombe*; *Sc*, *Saccharomyces cerevisiae*; *Ca*, *Candida albicans*; *Yl*, *Yarrowia lipolytica*; *Ef*, *Epichloë festucae*; *An*, *Aspergillus nidulans*; *Mo*, *Magnaporthe oryzae*; *Nc*, *Neurospora crassa*. (C) Maximum-likelihood dendrogram of fungal Prx proteins. Values above branches indicate bootstrap values based on 2000 replicates. Gene IDs with associated GenBank accession numbers in parentheses are as follows: *Sp*, *S. pombe* Tpx1 SPCC576.03c (NP\_588430.1), Bcp SPBC1773.02c (NP\_595117.1), Pmp20 SPCC330.06c (NP\_587706.1); *Sc*, *S. cerevisiae* Tsa1 YML028W (NP\_013684.1), Tsa2 YDR453C (NP\_010741.1), Prx1 YBL064C (NP\_009489.1), Dot5 YIL010W (NP\_012255.1), Ahp1 YLR109W (NP\_013210.1); *Ca*, *C. albicans* Tsa1

(XP\_716082.1), Prx1 (XP\_717002.1), Ahp1 (XP\_720512.1), TRP99 (XP\_715859.1), Ahp2 (XP\_721312.1), Dot5 (XP\_717789.1); Y1, *Y. lipolytica* YALI0B15125p (XP\_500915.1), YALI0E25091p (XP\_504381.1), YALI0F08195p (XP\_505152.1) YALI0E19448p (XP\_504146.1); Ef, *E. festucae* TpxA (EfM2.113210), Bcp-like (EfM2.115510), Pmp20-like (EfM2.064230); An, *A. nidulans* ANID\_03973.1 (XP\_661577.1), ANID\_10223.1 (CBF85378.1), ANID\_08080.1 (CBF73841.1), ANID\_08692.1 (XP\_681961.1), ANID\_03687.1 (CBF75606.1), ANID\_04301.1 (CBF77809.1); Mo, *M. oryzae* MGG\_08256.6 (XP\_362792.2), MGG\_07503.6 (XP\_367592.1), MGG\_00860.6 (XP\_368384.2), MGG\_02710.6 (XP\_366634.1); Nc, *N. crassa* NCU06031.5 (XP\_959621.1), NCU06880.5 (XP\_959227.1), NCU03151.5 (XP\_964200.2).  
 ◆ = filamentous fungal species, ● = yeast species.

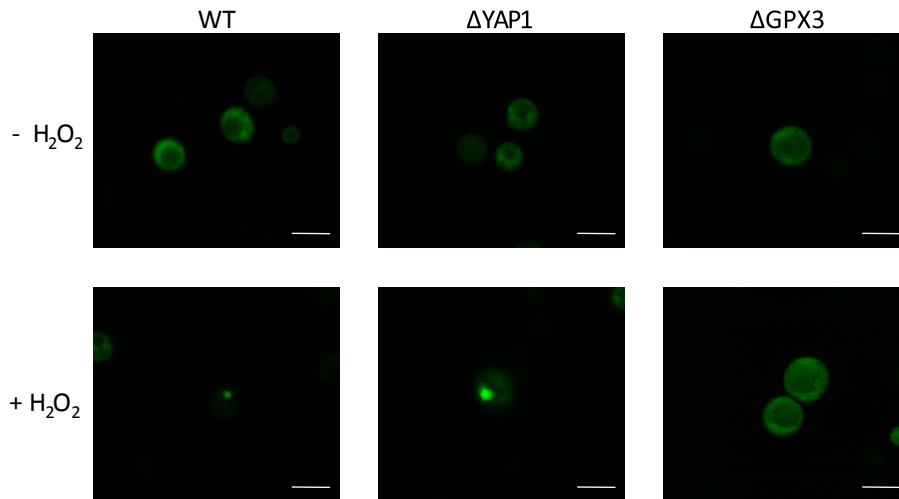

**SUPPL. FIG. 5.** Subcellular localization of Yap1 in *S. cerevisiae*. Confocal images of *S. cerevisiae* cells expressing *S. cerevisiae* Yap1-eGFP under the control of the *GALI* promoter (pGC18) in WT (PN2871),  $\Delta YAP1$  (PN2872) and  $\Delta GYPX3$  (PN2873) strains in the absence of  $H_2O_2$  (-  $H_2O_2$ ) and in cells treated with 0.4 mM  $H_2O_2$  (+  $H_2O_2$ ) for 10 min. Bar = 5  $\mu m$

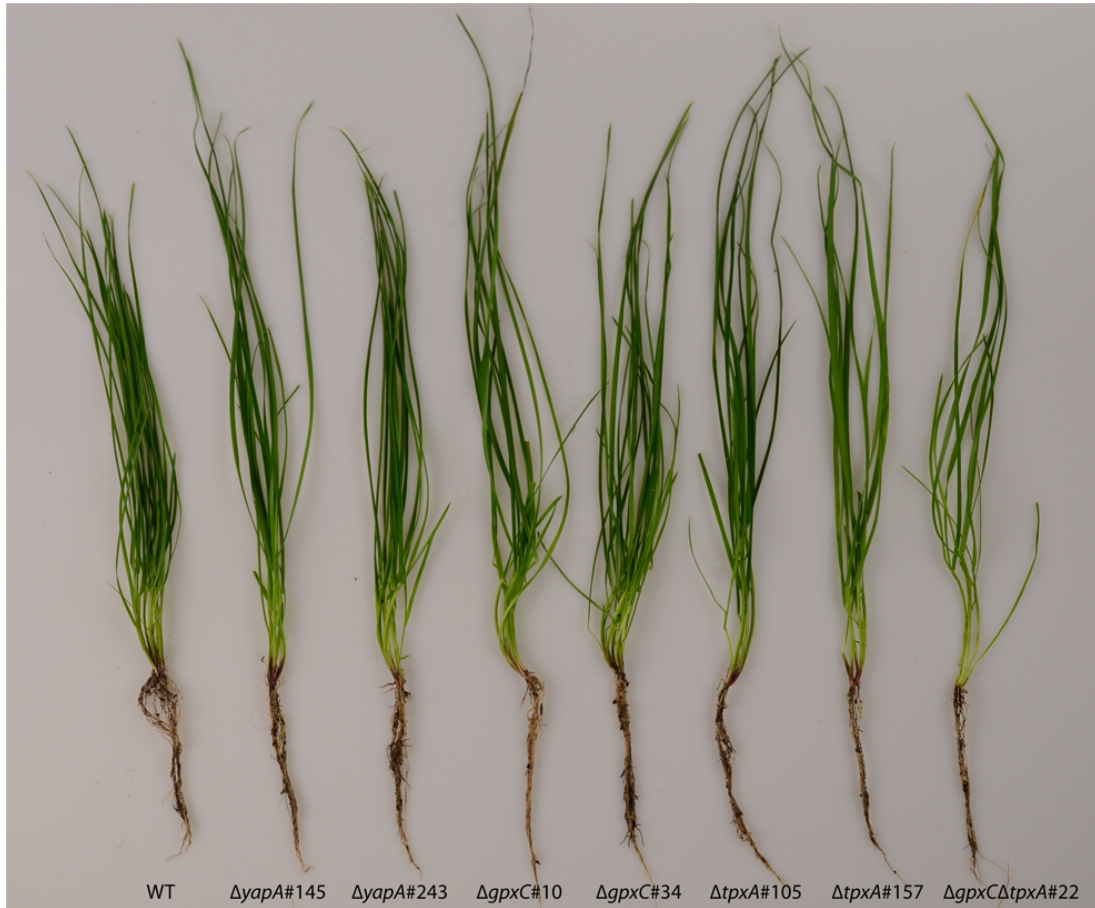

**SUPPL. FIG. 6.** Analysis of the *E. festucae*-*L. perenne* association. Photographs taken 8 weeks after inoculation with the following strains as indicated: *E. festucae* wild-type (WT),  $\Delta yapA\#145$ / PN2740 and  $\Delta yapA\#243$ /PN2787,  $\Delta gpxC\#10$ /PN2741 and  $\Delta gpxC\#34$ /PN2742,  $\Delta tpxA\#105$ /PN2821 and  $\Delta tpxA\#157$ /PN2822 and  $\Delta gpxC\Delta tpxA\#22$ /PN2831.

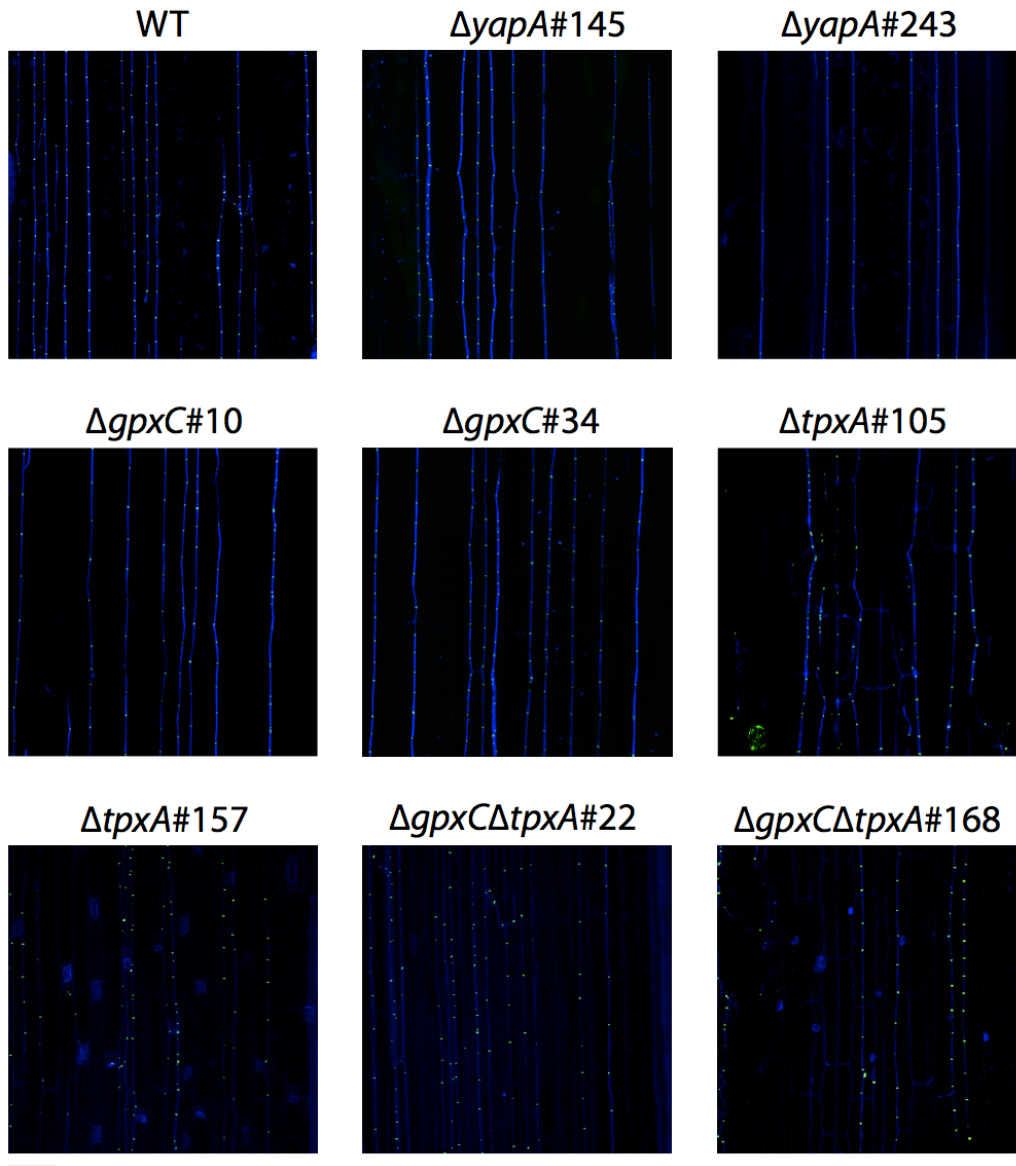

**SUPPL. FIG. 7.** Confocal analysis of the *E. festucae*-*L. perenne* association. Confocal depth series images of longitudinal sections through *L. perenne* pseudostem tissue, infected with *E. festucae* strains indicated as in Fig S6, stained with Alexafluor (WGA-AF488) and aniline blue. Images were generated by maximum intensity projection of 10 x 1  $\mu\text{m}$  confocal z-stacks. Bar = 50  $\mu\text{m}$

**Table S1. Organisms and plasmids**

| Strain               | Relevant characteristic(s)                                                                                       | Source or reference          |
|----------------------|------------------------------------------------------------------------------------------------------------------|------------------------------|
| <i>S. cerevisiae</i> |                                                                                                                  |                              |
| PN2735               | MATa; his3Δ1; leu2Δ0; met15Δ0; ura3Δ0 (BY4741; wild type)                                                        | Euroscarf, Frankfurt         |
| PN2736               | BY4741; MATa; his3Δ1; leu2Δ0; met15Δ0; ura3Δ0; YML007w::kanMX4 ( $\Delta yap1$ )                                 | Euroscarf, Frankfurt         |
| PN2737               | BY4741; MATa; his3Δ1; leu2Δ0; met15Δ0; ura3Δ0; YIR037w::kanMX4 ( $\Delta gpx3$ )                                 | Euroscarf, Frankfurt         |
| PN2845               | BY4741; MATa; his3 Δ 1; leu2 Δ 0; met15 Δ 0; ura3Δ0; YML007w::kanMX4 pGC8 ( $\Delta yap1/ScYAP1$ )               | This study                   |
| PN2846               | BY4741; MATa; his3Δ1; leu2Δ0; met15Δ0; ura3Δ0; YML007w::kanMX4 pGC6 ( $\Delta yap1/EfYapA$ )                     | This study                   |
| PN2847               | BY4741; MATa; his3Δ1; leu2Δ0; met15Δ0; ura3Δ0; YML007w::kanMX4 pYES2 ( $\Delta yap1/pYES2$ )                     | This study                   |
| PN2848               | BY4741; MATa; his3Δ1; leu2Δ0; met15Δ0; ura3Δ0; YIR037w::kanMX4 pGC7 ( $\Delta gpx3/ScGPX3$ )                     | This study                   |
| PN2849               | BY4741; MATa; his3Δ1; leu2Δ0; met15Δ0; ura3Δ0; YIR037w::kanMX4 pGC5 ( $\Delta gpx3/EfGpxC$ )                     | This study                   |
| PN2850               | BY4741; MATa; his3Δ1; leu2Δ0; met15Δ0; ura3Δ0; YIR037w::kanMX4 pYES2 ( $\Delta gpx3/pYES2$ )                     | This study                   |
| PN2871               | MATa; his3Δ1; leu2Δ0; met15Δ0; ura3Δ0 (WT/pGC18)                                                                 | This study                   |
| PN2872               | BY4741; MATa; his3Δ1; leu2Δ0; met15Δ0; ura3Δ0; YML007w::kanMX4 ( $\Delta yap1 / pGC18$ )                         | This study                   |
| PN2873               | BY4741; MATa; his3Δ1; leu2Δ0; met15Δ0; ura3Δ0; YIR037w::kanMX4 ( $\Delta GPX3/pGC18$ )                           | This study                   |
| <i>E. festucae</i>   |                                                                                                                  |                              |
| PN2278               | Wild type (F11)                                                                                                  | (Young <i>et al.</i> , 2005) |
| PN2739               | F11 / $\Delta yapA::PtrpC-hph$ ; Hyg <sup>R</sup> ( $\Delta yapA$ #243)                                          | This study                   |
| PN2740               | F11 / $\Delta yapA::PtrpC-hph$ ; Hyg <sup>R</sup> ( $\Delta yapA$ #145)                                          | This study                   |
| PN2787               | $\Delta yapA/yapA$ ; PN2739 / pGC11; Hyg <sup>R</sup> ; Gen <sup>R</sup> ( $\Delta yapA$ #243 / $yapA$ )         | This study                   |
| PN2788               | $\Delta yapA/yapA$ ; PN2740 / pGC11; Hyg <sup>R</sup> ; Gen <sup>R</sup> ( $\Delta yapA$ #145 / $yapA$ )         | This study                   |
| PN2741               | F11 / $\Delta gpxC::PtrpC-nptII-TtrpC$ ; Gen <sup>R</sup> ( $\Delta gpxC$ #10)                                   | This study                   |
| PN2742               | F11 / $\Delta gpxC::PtrpC-nptII-TtrpC$ ; Gen <sup>R</sup> ( $\Delta gpxC$ #34)                                   | This study                   |
| PN2821               | F11 / $\Delta tpxA::PtrpC-hph$ ; Hyg <sup>R</sup> ( $\Delta tpxA$ #105)                                          | This study                   |
| PN2822               | F11 / $\Delta tpxA::PtrpC-hph$ ; Hyg <sup>R</sup> ( $\Delta tpxA$ #157)                                          | This study                   |
| PN2828               | PN2821 / $\Delta gpxC::PtrpC-nptII-TtrpC$ ; Hyg <sup>R</sup> ; Gen <sup>R</sup> ( $\Delta gpxC\Delta tpxA$ #128) | This study                   |
| PN2829               | PN2821 / $\Delta gpxC::PtrpC-nptII-TtrpC$ ; Hyg <sup>R</sup> ; Gen <sup>R</sup> ( $\Delta gpxC\Delta tpxA$ #133) | This study                   |
| PN2830               | PN2821 / $\Delta gpxC::PtrpC-nptII-TtrpC$ ; Hyg <sup>R</sup> ; Gen <sup>R</sup> ( $\Delta gpxC\Delta tpxA$ #168) | This study                   |



|                |                                                                                                                                                |            |
|----------------|------------------------------------------------------------------------------------------------------------------------------------------------|------------|
| PN2831         | PN2821/ $\Delta$ gpxC::PtrpC-nptII-TtrpC; Hyg <sup>R</sup> ; Gen <sup>R</sup> ( $\Delta$ gpxC $\Delta$ tpxA#22)                                | This study |
| PN2789         | PN2741/ pGC9/pJW19/pAN8-1; Hyg <sup>K</sup> , Gen <sup>K</sup> , Zeo <sup>K</sup> ( $\Delta$ gpxC:: eGFP-yapA, DsRed-stuA(NLS))                | This study |
| PN2790         | PN2278/ pGC9, pJH19; Hyg <sup>K</sup> (F11::GFP-yapA, DsRed-stuA(NLS))                                                                         | This study |
| PN2823         | PN2821/ pGC10/ pJW19/ pSF17.8; Hyg <sup>K</sup> ; Gen <sup>K</sup> ( $\Delta$ tpxA:: eGFP-yapA, DsRed-stuA(NLS))                               | This study |
| PN2824         | PN2278/ pGC13; Gen <sup>K</sup> (F11::PcatA-EGFP)                                                                                              | This study |
| PN2836         | PN2739/ pGC14; Hyg <sup>K</sup> , Gen <sup>K</sup> ( $\Delta$ yapA#243::PcatA-eGFP-CL1 #1)                                                     | This study |
| PN2837         | PN2739/ pGC14; Hyg <sup>K</sup> , Gen <sup>K</sup> ( $\Delta$ yapA#243::PcatA-eGFP-CL1 #4)                                                     | This study |
| PN2838         | PN2278/ pGC14; Gen <sup>K</sup> (F11::PcatA-eGFP-CL1 #8)                                                                                       | This study |
| PN2839         | PN2278/ pGC14; Gen <sup>R</sup> (F11::PcatA-eGFP-CL1 #9)                                                                                       | This study |
| PN2840         | PN2278/ pGC14; Gen <sup>R</sup> (F11::PcatA-eGFP-CL1 #10)                                                                                      | This study |
| PN2841         | PN2278/ pGC14; Gen <sup>K</sup> (F11::PcatA-eGFP-CL1 #11)                                                                                      | This study |
| PN2842         | PN2740 $\Delta$ yapA#145/ pGC14; Hyg <sup>K</sup> , Gen <sup>K</sup> ( $\Delta$ yapA#145::PcatA-EGFP-CL1 #1)                                   | This study |
| PN2843         | PN2740/ pGC14; Hyg <sup>R</sup> , Gen <sup>R</sup> ( $\Delta$ yapA#145::PcatA-EGFP-CL1 #9)                                                     | This study |
| PN2844         | PN2739 $\Delta$ yapA#243/ pGC14; Hyg <sup>K</sup> , Gen <sup>K</sup> ( $\Delta$ yapA#243::PcatA-EGFP-CL1 #10)                                  | This study |
| PN2851         | PN2830/ pGC9/ pJW19/ pAN8-1; Hyg <sup>R</sup> , Gen <sup>R</sup> , Zeo <sup>R</sup> ( $\Delta$ gpxC $\Delta$ tpxA::eGFP-yapA, DsRed-stuA(NLS)) | This study |
| PN2874         | PN2278/ pGC19/ pJW19; Hyg <sup>K</sup> (F11::YAP1-eGFP, DsRed-stuA(NLS))                                                                       | This study |
| <i>E. coli</i> |                                                                                                                                                |            |
| PN4101         | One Shot® TOP10/ pGC4; Amp <sup>K</sup>                                                                                                        | This study |
| PN4103         | One Shot® TOP10/ pGC2; Amp <sup>K</sup>                                                                                                        | This study |
| PN4107         | One Shot® TOP10/ pGC6; Amp <sup>R</sup>                                                                                                        | This study |
| PN4108         | One Shot® TOP10/ pGC5; Amp <sup>R</sup>                                                                                                        | This study |
| PN4109         | One Shot® TOP10/ pGC7; Amp <sup>K</sup>                                                                                                        | This study |
| PN4110         | One Shot® TOP10/ pGC8; Amp <sup>R</sup>                                                                                                        | This study |
| PN4112         | One Shot® TOP10/ pGC10; Amp <sup>K</sup>                                                                                                       | This study |
| PN4113         | One Shot® TOP10/ pGC9; Amp <sup>R</sup>                                                                                                        | This study |
| PN4133         | One Shot® TOP10/ pGC11; Amp <sup>K</sup>                                                                                                       | This study |
| PN4135         | One Shot® TOP10/ pGC12; Amp <sup>R</sup>                                                                                                       | This study |
| PN4151         | One Shot® TOP10/ pGC13; Amp <sup>R</sup>                                                                                                       | This study |
| PN4174         | One Shot® TOP10/ pGC14; Amp <sup>K</sup>                                                                                                       | This study |
| PN4188         | One Shot® TOP10/ pGC16; Amp <sup>K</sup>                                                                                                       | This study |
| PN4193         | One Shot® TOP10/ pGC18; Amp <sup>R</sup>                                                                                                       | This study |
| PN4194         | One Shot® TOP10/ pGC19; Amp <sup>K</sup>                                                                                                       | This study |

|                 |                                                                                                                                                                                                                                                                                                                     |                                 |
|-----------------|---------------------------------------------------------------------------------------------------------------------------------------------------------------------------------------------------------------------------------------------------------------------------------------------------------------------|---------------------------------|
| PN1862          | One Shot® TOP10/ pSF15.15; Amp <sup>k</sup>                                                                                                                                                                                                                                                                         | S. Foster                       |
| PN1866          | One Shot® TOP10/ pSF17.8; Amp <sup>k</sup>                                                                                                                                                                                                                                                                          | S. Foster                       |
| PN1687          | One Shot® TOP10/ pII99; Amp <sup>k</sup>                                                                                                                                                                                                                                                                            | (Namiki <i>et al.</i> , 2001)   |
| PN4111          | One Shot® TOP10/ pPN94; Amp <sup>k</sup>                                                                                                                                                                                                                                                                            | (Takemoto <i>et al.</i> , 2006) |
| PN1390          | One Shot® TOP10/ pAN8-1; Amp <sup>k</sup>                                                                                                                                                                                                                                                                           | (Mattern <i>et al.</i> , 1988)  |
| PN4134          | One Shot® TOP10/ pJW19; Amp <sup>k</sup>                                                                                                                                                                                                                                                                            | (Toews <i>et al.</i> , 2004)    |
| PN4201          | One Shot® TOP10/ pYES2; Amp <sup>k</sup>                                                                                                                                                                                                                                                                            | Invitrogen                      |
| <b>Plasmids</b> |                                                                                                                                                                                                                                                                                                                     |                                 |
| pGC2            | 1.1-kb <i>Bgl</i> III/ <i>Kpn</i> I fragment 5' of <i>yapA</i> amplified with <i>yap1</i> / <i>yap2</i> and 1.2-kb <i>Hind</i> III/ <i>Xho</i> I fragment 3' of <i>yapA</i> amplified with <i>yap3</i> / <i>yap4</i> in pSF15.15                                                                                    | This study                      |
| pGC4            | 1.1-kb <i>Bgl</i> III/ <i>Kpn</i> I 5' of <i>gpxC</i> amplified with <i>gpx1</i> / <i>gpx2</i> and 1.4-kb <i>Sal</i> I/ <i>Sal</i> I fragment 3' of <i>gpxC</i> amplified with <i>gpx3</i> / <i>gpx4</i> in pSF17.8                                                                                                 | This study                      |
| pGC5            | 0.5-kb <i>Eco</i> RI/ <i>Xba</i> I <i>gpxC</i> cDNA fragment amplified with <i>gpx5</i> / <i>gpx6</i> in pYES2                                                                                                                                                                                                      | This study                      |
| pGC6            | 1.7-kb <i>Eco</i> RI/ <i>Xba</i> I <i>yapA</i> cDNA fragment amplified with <i>yap5</i> / <i>yap6</i> in pYES2                                                                                                                                                                                                      | This study                      |
| pGC7            | 0.5-kb <i>Hind</i> III/ <i>Xba</i> I <i>gpx3</i> gDNA fragment amplified with <i>gpx7</i> / <i>gpx8</i> in pYES2                                                                                                                                                                                                    | This study                      |
| pGC8            | 1.9-kb <i>Hind</i> III/ <i>Xba</i> I <i>yap1</i> gDNA fragment amplified with <i>yap7</i> / <i>yap8</i> in pYES2                                                                                                                                                                                                    | This study                      |
| pGC9            | 1.7-kb y <i>Eco</i> RI/ <i>Cl</i> aI <i>yapA</i> cDNA fragment amplified with <i>yap27</i> / <i>yap28</i> and 0.8-kb <i>Cl</i> aI/ <i>Not</i> I EGFP fragment amplified with GCGFP1/GCGFP2 in <i>Eco</i> RI/ <i>Not</i> I site of pPN94 ( <i>yapA</i> -EGFP)                                                        | This study                      |
| pGC10           | 0.8-kb <i>Eco</i> RI/ <i>Cl</i> aI EGFP fragment amplified with EGFP1/EGFP2 and 1.7-kb <i>Cl</i> aI/ <i>Not</i> I <i>yapA</i> cDNA fragment amplified with <i>yap29</i> / <i>yap30</i> in <i>Eco</i> RI/ <i>Not</i> I site of pPN94 (EGFP- <i>yapA</i> )                                                            | This study                      |
| pGC11           | 3.7-kb <i>Eco</i> RV/ <i>Eco</i> RI fragment from cosmid 28E7 in pSF17.8                                                                                                                                                                                                                                            | This study                      |
| pGC12           | 2.3-kb <i>Bgl</i> III/ <i>Kpn</i> I fragment 5' of <i>tpxA</i> amplified with <i>tpx1</i> / <i>tpx2</i> and 2.5-kb <i>Bam</i> HI/ <i>Xba</i> I fragment 3' of <i>tpxA</i> amplified with <i>tpx3</i> / <i>tpx4</i> in pSF15.15                                                                                      | This study                      |
| pGC13           | 1-kb <i>Xba</i> I/ <i>Eco</i> RI <i>PcatA</i> fragment amplified with <i>pcatA3</i> / <i>pcatA4</i> , cloned into <i>Xba</i> I/ <i>Eco</i> RI site of pGC10, 1.8-kb <i>Xba</i> I/ <i>Xho</i> I <i>PcatA</i> -EGFP fragment cloned into <i>Xba</i> I/ <i>Xho</i> I fragment in pSF17.8 ( <i>PcatA</i> -EGFP)         | This study                      |
| pGC14           | 1.2-kb <i>Sac</i> II/ <i>Nde</i> I fragment containing a 48 bp insert 3' of <i>PcatA</i> -EGFP amplified in two steps with pCatAF1/CL1R1 and pCatAF1/CL1R2 and replacing the <i>Sac</i> II/ <i>Nde</i> I fragment in pGC13 ( <i>PcatA</i> -EGFP-CL1)                                                                | This study                      |
| pGC16           | 1-kb <i>PtpxA</i> fragment amplified with <i>tpx37</i> / <i>tpx41</i> and 0.7-kb EGFP-CL1 fragment amplified with <i>tpx39</i> / <i>tpx40</i> , recombined in yeast and <i>Xba</i> I/ <i>Nde</i> I <i>PtpxA</i> -EGFP-CL1 fragment cloned into <i>Xba</i> I/ <i>Nde</i> I site of pSF17.8 ( <i>PtpxA</i> -EGFP-CL1) | This study                      |
| pGC18           | 2.7-kb <i>Eco</i> RI/ <i>Not</i> I <i>yap1</i> -EGFP fragment from pGC9 cloned into <i>Eco</i> RI/ <i>Not</i> I site of pYES2 (PGAL1- <i>Yap1</i> -EGFP)                                                                                                                                                            | This study                      |

|            |                                                                                                                                                                                                                                                                      |                                           |
|------------|----------------------------------------------------------------------------------------------------------------------------------------------------------------------------------------------------------------------------------------------------------------------|-------------------------------------------|
| pGC19      | 2.0-kb <i>EcoRI/NotI yap1</i> fragment amplified with ScYap6/ScYap8 and 0.7-kb <i>EGFP</i> fragment amplified with GCGFP3/GCGFP4, recombined in yeast and <i>EcoRI/NotI YAP1-EGFP</i> fragment cloned into <i>EcoRI/NotI</i> site of pPN94 ( <i>PTEF-YAP1-EGFP</i> ) | This study                                |
| pSF15.15   | pSP72 containing 1.4-kb <i>HindIII PtrpC-hph</i> from pCB1004 cloned into <i>SmaI</i> site Amp <sup>R</sup> ; Hyg <sup>R</sup>                                                                                                                                       | S. Foster                                 |
| pSF17.8    | Amp <sup>R</sup> ; Gen <sup>R</sup>                                                                                                                                                                                                                                  | S. Foster                                 |
| pII99      | <i>PtrpC-nptII-TtrpC</i> ; Amp <sup>R</sup> /Gen <sup>R</sup>                                                                                                                                                                                                        | (Namiki <i>et al.</i> , 2001)             |
| pPN94      | pSF14.14 containing 0.8-kb <i>SalI/XbaI tef</i> promoter in <i>XhoI/XbaI</i> site and 0.6-kb <i>EcoRI/BglII TtrpC</i> in <i>EcoRI/BglII</i> site                                                                                                                     | (Vanden Wymelenberg <i>et al.</i> , 1997) |
| pAN8-1     | <i>Pgpd-sh ble-TtrpC</i> ; Amp <sup>R</sup> /Zeo <sup>R</sup>                                                                                                                                                                                                        | (Mattern <i>et al.</i> , 1988)            |
| pJW19      | <i>Pgpd-DsRed-stuA(NLS)</i> , <i>argB+</i> in pBluescript KS-; Amp <sup>R</sup>                                                                                                                                                                                      | (Toews <i>et al.</i> , 2004)              |
| pYES2      | Amp <sup>R</sup> ; URA3                                                                                                                                                                                                                                              | Invitrogen                                |
| pCR4-TOPO® | Amp <sup>R</sup> ; LacZ $\alpha$ - <i>ccdB</i>                                                                                                                                                                                                                       | Invitrogen                                |
| Cosmids    |                                                                                                                                                                                                                                                                      |                                           |
| 28E7       | pMO-cosX clone Fl1 genomic DNA cosmid library containing the <i>yapA</i> gene and 5'UTR.                                                                                                                                                                             | This study                                |

**Table S2. Primer sequences**

| Name    | Sequence (5' – 3')                                         | Used for                                   |
|---------|------------------------------------------------------------|--------------------------------------------|
| CL1 R1  | CAGGGAGGAGAACCAGTTCTTGCAGGCTAGA<br>ACTCGAGACTTGTACAGCTCGTC | <i>PcatA-eGFP</i> -CL1<br>fusion construct |
| CL1 R2  | CATATGCAGGTGGATGACGAAGTGGGACAG<br>GGAGGAGAACCAGTTCTTGCAG   | <i>PcatA-eGFP</i> -CL1<br>fusion construct |
| GCGFP1  | ATCGATGGTGCTGGTGCTGG                                       | <i>yapA-eGFP</i> fusion<br>construct       |
| GCGFP2  | GCGGCCGCTTTACTTGTACAG                                      | <i>yapA-eGFP</i> fusion<br>construct       |
| GCGFP3  | GCGGATAACAATTTACACAGGAAACAGCGC<br>GGCCGCTTTACTTGTACAG      | <i>PTEF-YAP1-eGFP</i><br>fusion construct  |
| GCGFP4  | GGTGCTGGTGCTGGTGCT                                         | <i>PTEF-YAP1-eGFP</i><br>fusion construct  |
| gpx1    | AGATCTAGCCTTTTAAGAAGCACAACG                                | 5' <i>gpxC</i> replacement<br>construct    |
| gpx2    | GGTACCGAGTTTCACATGTGATCAGTA                                | 5' <i>gpxC</i> replacement<br>construct    |
| gpx3    | GTCGACGGGATTTTCATATGCTATG                                  | 3' <i>gpxC</i> replacement<br>construct    |
| gpx4    | GTCGACCTATGCATGTTAGCAACC                                   | 3' <i>gpxC</i> replacement<br>construct    |
| gpx5    | GAATTCATGGCCTCCGCCACGAGCTTCT                               | <i>S. cerevisiae</i><br>complementation    |
| gpx6    | TCTAGATTAAGCCTTCTTCGCCAATTCGT                              | <i>S. cerevisiae</i><br>complementation    |
| gpx7    | AAGCTTATGTCAGAATTCTATAAGCTAGCAC<br>C                       | <i>S. cerevisiae</i><br>complementation    |
| gpx8    | TCTAGACTATTCCACCTCTTTCAAAAGTTC                             | <i>S. cerevisiae</i><br>complementation    |
| gpx9    | ATGATGCCGCCACCTACGAAAT                                     | screening <i>gpxC</i> for<br>replacement   |
| gpx10   | AGAACTCGTCAAGAAGGCGATAGA                                   | screening <i>gpxC</i> for<br>replacement   |
| gpx11   | TATTCGGCTATGACTGGGCAC                                      | screening <i>gpxC</i> for<br>replacement   |
| gpx12   | TACATACGGAGTAGTCCATAAACATA                                 | screening <i>gpxC</i> for<br>replacement   |
| gpx15   | TCTTCCATACTGATCACATG                                       | screening <i>gpxC</i> for<br>replacement   |
| gpx16   | ATCGATCTGTGAACACAGAC                                       | screening <i>gpxC</i> for<br>replacement   |
| pCatA3  | TCTAGACGTTTTTCATTGAGCAACA                                  | <i>PcatA-eGFP</i> fusion<br>construct      |
| pCatA4  | GAATTCTCTCGCGGTATTGGGG                                     | <i>PcatA-eGFP</i> fusion<br>construct      |
| pCatAF1 | CCGCGGATGCAGGTCAAACACGCACTTTGC<br>GAGTTTG                  | <i>PcatA-eGFP</i> -CL1<br>fusion construct |
| ScYap6  | GTAACGCCAGGGTTTTCCAGTCACGACGAA<br>TTCATGAGTGTGTCTACC       | <i>PTEF-YAP1-eGFP</i><br>fusion construct  |
| ScYap8  | CCCTTGCTCACAGCACCAGCACCAGCACCAT<br>CGATGTTTCATATGCTTATT    | <i>PTEF-YAP1-eGFP</i><br>fusion construct  |

|       |                                |                                       |
|-------|--------------------------------|---------------------------------------|
| tpx1  | AGATCTAATAAGCTAAGGGTTCTC       | 5' <i>tpxA</i> replacement construct  |
| tpx2  | GGTACCGAGTATATGTATGTATGATGC    | 5' <i>tpxA</i> replacement construct  |
| tpx3  | GGATCCAATCAGGGAAGGCGAC         | 3' <i>tpxA</i> replacement construct  |
| tpx4  | TCTAGACGTCCGTTATTGCTGCAA       | 3' <i>tpxA</i> replacement construct  |
| tpx13 | CACACCAAGGCGTGAAACCCC          | screening <i>tpxA</i> for replacement |
| tpx14 | CAGTCCATTCCCACGTCTTGGTC        | screening <i>tpxA</i> for replacement |
| tpx15 | ACCCTCCTCCTTATTAGTAA           | screening <i>tpxA</i> for replacement |
| tpx16 | TGCTCCTTCAATATCAGTTC           | screening <i>tpxA</i> for replacement |
| tpx17 | AGCACTCGTCCGAGGGCAAA           | screening <i>tpxA</i> for replacement |
| tpx18 | ACGCATCCATCTTTGCCGAAC          | screening <i>tpxA</i> for replacement |
| yap1  | AGATCTCACGAGATGAAAAACGTTT      | 5' <i>yapA</i> replacement construct  |
| yap2  | GGTACCGTGTTCTGTTGTTTGTG        | 5' <i>yapA</i> replacement construct  |
| yap3  | AAGCTTGACGGCGTTAAAGAACT        | 3' <i>yapA</i> replacement construct  |
| yap4  | CTCGAGATGTGTACTCTGACGTTGT      | 3' <i>yapA</i> replacement construct  |
| yap5  | GAATTCATGTCATCAAGTGGCAGCGG     | <i>S. cerevisiae</i> complementation  |
| yap6  | TCTAGACTAAGGCATGGTAGCGCCGT     | <i>S. cerevisiae</i> complementation  |
| yap7  | AAGCTTATGAGTGTGTCTACCGCCAAG    | <i>S. cerevisiae</i> complementation  |
| yap8  | TCTAGATTAGTTCATATGCTTATTCAAAGC | <i>S. cerevisiae</i> complementation  |
| yap9  | ACGCACGAATGAATACAATAAACT       | screening <i>yapA</i> for replacement |
| yap10 | GATTTGTGTACGCCAGACAGTCC        | screening <i>yapA</i> for replacement |
| yap11 | CTGAACTCACCGCGACGTCTGT         | screening <i>yapA</i> for replacement |
| yap21 | CCGACTTCACTCACAACATCAGC        | screening <i>yapA</i> for replacement |
| yap22 | TCATCAAGTGGCAGCGGAGG           | screening <i>yapA</i> for replacement |
| yap23 | ATTGACTGACGAGGGCCAG            | screening <i>yapA</i> for replacement |
| yap27 | GAATTCATGTCATCAAGTGGC          | <i>yapA-eGFP</i> fusion construct     |
| yap28 | ATCGATAGGCATGGTAGCG            | <i>yapA-eGFP</i> fusion construct     |

## References

1. **Young CA, Bryant MK, Christensen MJ, Tapper BA, Bryan GT, Scott B.** 2005. Molecular cloning and genetic analysis of a symbiosis-expressed gene cluster for lolitrem biosynthesis from a mutualistic endophyte of perennial ryegrass. *Mol. Gen. Genomics* **274**:13-29.
2. **Namiki F, Matsunaga M, Okuda M, Inoue I, Nishi K, Fujita Y, Tsuge T.** 2001. Mutation of an arginine biosynthesis gene causes reduced pathogenicity in *Fusarium oxysporum* f. sp. *melonis*. *Mol. Plant-Microbe Interact.* **14**:580-584.
3. **Takemoto D, Tanaka A, Scott B.** 2006. A p67(Phox)-like regulator is recruited to control hyphal branching in a fungal-grass mutualistic symbiosis. *Plant Cell* **18**:2807-2821.
4. **Mattern IE, Punt PJ.** 1988. A vector of *Aspergillus* transformation conferring phleomycin resistance. *Fungal Genetics Newsletter* **35**:25.
5. **Toews MW, Warmbold J, Konzack S, Rischitor P, Veith D, Vienken K, Vinuesa C, Wei H, Fischer R.** 2004. Establishment of mRFP1 as a fluorescent marker in *Aspergillus nidulans* and construction of expression vectors for high-throughput protein tagging using recombination *in vitro* (GATEWAY). *Curr. Genet.* **45**:383-389.
6. **Vanden Wymelenberg AJ, Cullen D, Spear RN, Schoenike B, Andrews JH.** 1997. Expression of green fluorescent protein in *Aureobasidium pullulans* and quantification of the fungus on leaf surfaces. *Biotechniques* **23**:686-690.
